# Supplementary material
Source: publisher site journal article supplement (https://thieme-connect.com/media/10.1055-s-00035023/201203/supmat/10-3415-vcot-11-06-0092-supp.pdf)
Supplement: Supplementary file 1 [file 10-3415-vcot-11-06-0092-supp.pdf]

Supplementary Material to:

## Prevalence of spondylosis deformans in the feline spine and correlation with owner-perceived behavioural changes

H. C. Kranenburg<sup>1</sup>; B. P. Meij<sup>1</sup>; E. M. L. van Hofwegen<sup>1</sup>; G. Voorhout<sup>2</sup>;  
L. I. Slingerland<sup>1</sup>; P. Picavet<sup>3</sup>; H. A. W. Hazewinkel<sup>1</sup>

<sup>1</sup>*Utrecht University, Faculty of Veterinary Medicine, Department of Clinical Sciences of Companion Animals, Utrecht, The Netherlands;* <sup>2</sup>*Utrecht University, Faculty of Veterinary Medicine, Division of Diagnostic Imaging, Utrecht, The Netherlands;* <sup>3</sup>*Hill's Pet Nutrition, Westbroek, Breda, The Netherlands*

**Vet Comp Orthop Traumatol 2012; 25: 217-223**

**doi:10.3415/VCOT-11-06-0092**

**Appendix 1:** Reason for referral of cats from group 1 and group 2 and from cats of group 2 with spondylosis deformans.

| Reason for referral     | Group 1 | Group 2 | Cats with Spondylosis (group 2) |
|-------------------------|---------|---------|---------------------------------|
|                         | (n)     | (n)     | (n)                             |
| Pulmonary disease       | 90      | 0       | 0                               |
| Cancer                  | 86      | 19      | 6                               |
| Trauma                  | 57      | 0       | 0                               |
| Multiple                | 47      | 0       | 0                               |
| Cardiology              | 30      | 6       | 2                               |
| Gastroenterology        | 23      | 6       | 3                               |
| Neurologic              | 14      | 0       | 0                               |
| Urology and Nephrology  | 14      | 8       | 0                               |
| Fever of Unknown Origin | 9       | 0       | 0                               |
| Haematology             | 7       | 1       | 0                               |
| Without final diagnosis | 6       | 0       | 0                               |
| Ears-nose-throat        | 6       | 21      | 8                               |
| Hepatology              | 5       | 1       | 1                               |
| Other                   | 3       | 2       | 0                               |
| Endocrinology           | 3       | 3       | 1                               |
| Orthopaedics            | 2       | 4       | 0                               |
| Dermatology             | 0       | 2       | 0                               |
| Vaccination             | 0       | 5       | 1                               |
| Abscess                 | 0       | 1       | 0                               |
| Ophthalmology           | 0       | 15      | 5                               |
| Dentistry               | 0       | 6       | 1                               |
| Total                   | 402     | 100     | 28                              |

**Appendix 2:** Loading of responses to the questionnaire (first column) into five new variables by ordinal (questions 1 and 2) or categorical principal component analysis (PCA). The loadings > 0.40 and < -0.40 are considered significantly related and depicted in grey. Three possible answers (less, the same or more) were possible for all questions, except questions 4, 9 and 11 (yes or no), question 1 (indoor only, outdoor only, in- and outdoor) and question 2 (“0 hr”, “0 to < 3hrs” or “3 or more hours”).

| Questions                                                           | PCA variable |        |        |        |        |
|---------------------------------------------------------------------|--------------|--------|--------|--------|--------|
|                                                                     | 1            | 2      | 3      | 4      | 5      |
| 01. Indoor or outdoor cat or both.                                  | -0.271       | -0.202 | 0.886  | -0.237 | -0.044 |
| 02. Time spent outside.                                             | -0.271       | -0.202 | 0.886  | -0.237 | -0.044 |
| 03. Change in acceptance of brushing hair coat.                     | 0.351        | -0.262 | 0.191  | -0.254 | 0.257  |
| 04. Elimination directly over the edge of the litter box.           | -0.159       | -0.215 | -0.089 | -0.359 | 0.640  |
| 05. Change in elimination directly over the edge of the litter box. | -0.210       | -0.186 | -0.129 | -0.504 | 0.538  |
| 06. Change in playing with other animals.                           | 0.064        | 0.210  | 0.252  | 0.228  | -0.153 |
| 07. Change in activity of the cat.                                  | 0.368        | -0.005 | 0.119  | 0.391  | 0.107  |
| 08. Change in jumping on objects.                                   | 0.720        | 0.073  | 0.085  | 0.033  | 0.122  |
| 09. Has the height of objects the cat can jump on decreased?        | -0.782       | 0.114  | 0.136  | 0.013  | -0.128 |
| 10. Change in jumping off objects.                                  | 0.705        | 0.060  | 0.197  | -0.022 | 0.100  |
| 11. Has the height of objects the cat jumps off decreased?          | -0.777       | 0.093  | 0.037  | 0.017  | 0.004  |
| 12. Change in jumping high jumps.                                   | 0.566        | -0.170 | -0.097 | -0.039 | 0.057  |
| 13. Change in accessibility of cat's favourite places.              | 0.424        | -0.209 | 0.048  | -0.033 | 0.080  |
| 14. Change in walking upstairs.                                     | 0.751        | -0.073 | 0.066  | -0.184 | -0.286 |
| 15. Change in walking downstairs.                                   | 0.643        | -0.137 | 0.035  | 0.002  | -0.367 |
| 16. Change in stiffness.                                            | -0.603       | 0.227  | 0.005  | 0.140  | 0.167  |
| 17. Change in aggressiveness.                                       | 0.076        | -0.648 | -0.315 | 0.101  | 0.041  |
| 18. Change in cat satisfaction.                                     | 0.419        | 0.513  | 0.139  | -0.185 | 0.095  |
| 19. Change in greeting people.                                      | 0.159        | 0.785  | -0.063 | -0.174 | 0.125  |
| 20. Change in acceptance being petted.                              | -0.033       | -0.590 | 0.099  | 0.477  | -0.048 |
| 21. Change in inter-cat socialization.                              | 0.037        | -0.025 | 0.047  | 0.270  | 0.489  |
| 22. Change in number of grooming moments.                           | 0.515        | 0.167  | 0.217  | 0.187  | 0.399  |
| 23. Change in time spent grooming.                                  | 0.658        | 0.083  | 0.214  | 0.261  | 0.254  |
| 24. Ever hit by a car?                                              | -0.013       | 0.450  | 0.096  | 0.134  | -0.003 |
| 25. Lameness in past?                                               | -0.163       | 0.042  | 0.322  | 0.435  | 0.122  |
| 26. Present lameness?                                               | -0.347       | 0.022  | 0.026  | 0.519  | 0.387  |
